# Supplementary material
Source: HighWire-hosted journal article supplement (https://jnm.snmjournals.org/highwire/filestream/94093/field_highwire_adjunct_files/0/66217_Supplemental_Tables.pdf)
Supplement: 66217_Supplemental_Tables.pdf [file 66217_Supplemental_Tables.pdf]

**SUPPLEMENTAL TABLE 1. The additional characteristics and reported diagnostic performance of 10 studies included in the meta-analysis**

| Author / year (Reference) | No. of evaluated patients / No. of patients in original cohort | Inclusion–exclusion criteria                                                                                                                                                                    | Technical characteristics                                                                                                       | Reported diagnostic performance (Sensitivity /Specificity) | Country |
|---------------------------|----------------------------------------------------------------|-------------------------------------------------------------------------------------------------------------------------------------------------------------------------------------------------|---------------------------------------------------------------------------------------------------------------------------------|------------------------------------------------------------|---------|
| Rose / 1999 (40)          | 32/32                                                          | Inclusion: FIGO stage IIB to IVA, no evidence of extrapelvic disease by CT scanning<br>Exclusion: under 18 years of age, medically unstable, pregnant, lactating, body weight exceed 350 pounds | FDG: 20 mCi<br>Fasting: 4h<br>Time interval: 60 min<br>PET scanner: Siemens ECAT EXACT                                          | 75%<br>/92%                                                | US      |
| Narayan / 2001 (37)       | 26/27                                                          | Inclusion: All operable patients without definitive CT evidence of PALN disease (only PALN sampling if enlarged pelvic nodes was detected on CT scan)                                           | FDG: 80 to 120 MBq<br>Fasting: 4h<br>Time interval: 60 min<br>PET scanner: PENN-PET 300H, UGM Medical Systems, Philadelphia, PA | 40%<br>/95%                                                | US      |
| Reinhardt / 2001 (38)     | 12/35                                                          | Inclusion: cervical cancer patients                                                                                                                                                             | FDG: 370 MBq<br>Fasting: overnight<br>Time interval: 100 min<br>PET scanner: Siemens ECAT EXACT 921                             | 100%<br>/100%                                              | Germany |

|                    |       |                                                                                                                                                                                                                                                                          |                                                                                                                                                                                                   |             |       |
|--------------------|-------|--------------------------------------------------------------------------------------------------------------------------------------------------------------------------------------------------------------------------------------------------------------------------|---------------------------------------------------------------------------------------------------------------------------------------------------------------------------------------------------|-------------|-------|
| Lin / 2003 (35)    | 50/50 | Inclusion: FIGO stage IIB through IVA or stage IB or IIA with a tumor diameter of at least 5 cm or involvement of pelvic lymph nodes) with negative abdominal CT finding (PALN less than 1.0 cm size)<br>Exclusion: diabetic, pregnant, lactating, under 18 years of age | FDG: 10 mCi (370 MBq)<br>Fasting: 4h<br>Time interval: 60 min<br>PET scanner: GE advanced NXi PET (Milwaukee, WI)                                                                                 | 86%<br>/94% | China |
| Roh / 2005 (39)    | 54/54 | Inclusion: FIGO stage IB-IVA, age 18-65, no contraindication for surgery, no evidence of distant metastasis, ECOG performance score 0-1                                                                                                                                  | FDG: 10-15 mCi (370-555 MBq)<br>Fasting: 8h<br>Time interval: 60 min<br>PET scanner: GE advance, Milwaukee, WI                                                                                    | 0<br>/100%  | Korea |
| Wright / 2005 (42) | 45/59 | Inclusion: Invasive, FIGO stage IA2-IIA cervical carcinoma                                                                                                                                                                                                               | FDG: 15-20 mCi<br>Fasting: 4h<br>Time interval: 45-60 min<br>Conventional PET scanner (before Nov, 2002); PET-CT scanner (from Nov, 2002): Biograph LSO 2; Siemens Medical Solutions, Malvern, PA | 25%<br>/98% | US    |
| Choi / 2006 (33)   | 27/22 | Inclusion: FIGO stage IB-IVA invasive cervical cancer, no contraindication to the surgical procedures, no evidence of distant metastasis, ECOG performance score 0-1                                                                                                     | FDG: 12-20 mCi (444-740 MBq)<br>Fasting: 8h<br>Time interval: 60 min<br>PET-CT scanner: Biograph LSO (Siemens Medical Solutions) or                                                               | 33%<br>/92% | Korea |

|                       |       |                                                                                                                                                                                                                                                                                                                                                                                     |                                                                                                                                                                                                    |             |         |
|-----------------------|-------|-------------------------------------------------------------------------------------------------------------------------------------------------------------------------------------------------------------------------------------------------------------------------------------------------------------------------------------------------------------------------------------|----------------------------------------------------------------------------------------------------------------------------------------------------------------------------------------------------|-------------|---------|
| Boughanim / 2008 (32) | 38/38 | <p>Exclusion: histology other than squamous cell carcinoma</p> <p>Inclusion: FIGO stage IB2 or II cervical cancer</p> <p>Exclusion: patients with PALN suggestive of abnormality on MRI or CT scan and with significant uptake in PALN in PET-CT</p>                                                                                                                                | <p>Discovery LS (GE Medical Systems)</p> <p>FDG: 4-5 MBq/kg</p> <p>Fasting: NR</p> <p>Time interval: 50-70 min</p> <p>PET scanner: Biograph LSO (Siemens Medical Solutions, Erlangen, Germany)</p> | 0<br>/100%  | France  |
| Vergote / 2008 (41)   | 85/44 | <p>Inclusion: FIGO stage IB2-III B cervical cancer without PALN metastasis on PET and CT or PET-CT</p>                                                                                                                                                                                                                                                                              | NR                                                                                                                                                                                                 | 0<br>/100%  | Belgium |
| Yildirim / 2008 (43)  | 16/16 | <p>Inclusion: patients with locally advanced cervical cancer with negative CT findings for PALN metastasis</p> <p>Exclusion: age &gt; 70 years, concurrent or previous malignant disease, previous radiation therapy, adenocarcinoma or adenosquamous carcinoma histology, WHO performance status <math>\geq</math> 3, inadequate renal, hepatic, cardiac function, BMI &gt; 40</p> | <p>FDG: 10-15 mCi (370-555 MBq)</p> <p>Fasting: 4h</p> <p>Time interval: 60 min</p> <p>PET scanner: NR</p>                                                                                         | 50%<br>/83% | Turkey  |

FIGO = International Federation of Gynecology and Obstetrics; FDG =  $^{18}\text{F}$ -fluorodeoxyglucose; PET = positron emission tomography; PALN = para-aortic lymph node; CT = computed tomography; ECOG = Eastern Cooperative Oncology Group; WHO = World Health Organization; NR = not reported

**SUPPLEMENTAL TABLE 2. Quality assessment scores of 10 studies included in the meta-analysis**

| QUADAS components                                                                                                                                                  | Rose<br>1999 | Narayan<br>2001 | Reinhardt<br>2001 | Lin<br>2003 | Roh<br>2005 | Wright<br>2005 | Choi<br>2006 | Boughanim<br>2008 | Vergote<br>2008 | Yildirim<br>2008 |
|--------------------------------------------------------------------------------------------------------------------------------------------------------------------|--------------|-----------------|-------------------|-------------|-------------|----------------|--------------|-------------------|-----------------|------------------|
| 1. Was the spectrum of patients representative of the patients who will receive the test in practice?                                                              | 0            | 0               | 0                 | 0           | 0           | 0              | 0            | 0                 | 0               | 0                |
| 2. Were selection criteria clearly described?                                                                                                                      | 1            | 0               | 0                 | 1           | 1           | 0              | 1            | 0                 | 0               | 1                |
| 3. Is the reference standard likely to correctly classify the target condition?                                                                                    | 1            | 1               | 1                 | 1           | 1           | 1              | 1            | 1                 | 1               | 1                |
| 4. Is the time period between reference standard and index test short enough to be reasonably sure that the target condition did not change between the two tests? | 0            | 0               | 0                 | 0           | 0           | 0              | 0            | 0                 | 1               | 1                |
| 5. Did the whole sample or a random selection of the sample, receive verification using a reference standard of diagnosis?                                         | 1            | 0               | 0                 | 0           | 1           | 0              | 1            | 1                 | 0               | 1                |
| 6. Did patients receive the same reference standard regardless of the index test result?                                                                           | 1            | 1               | 1                 | 1           | 1           | 1              | 1            | 1                 | 1               | 1                |
| 7. Was the reference standard independent of the index test?                                                                                                       | 1            | 1               | 1                 | 1           | 1           | 1              | 1            | 1                 | 1               | 1                |

|                                                                                                                                       |    |   |   |   |   |   |    |   |   |    |
|---------------------------------------------------------------------------------------------------------------------------------------|----|---|---|---|---|---|----|---|---|----|
| 8. Was the execution of the index test described in sufficient detail to permit replication of the test?                              | 1  | 1 | 1 | 1 | 1 | 1 | 1  | 1 | 0 | 0  |
| 9. Was the execution of the reference standard described in sufficient detail to permit its replication?                              | 1  | 1 | 0 | 1 | 1 | 1 | 1  | 1 | 1 | 1  |
| 10. Were the index test results interpreted without knowledge of the results of the reference standard?                               | 0  | 1 | 1 | 0 | 0 | 0 | 1  | 1 | 0 | 1  |
| 11. Were the reference standard results interpreted without knowledge of the results of the index test?                               | 0  | 0 | 0 | 0 | 0 | 0 | 0  | 0 | 0 | 0  |
| 12. Were the same clinical data available when test results were interpreted as would be available when the test is used in practice? | 1  | 1 | 1 | 1 | 1 | 1 | 1  | 1 | 1 | 1  |
| 13. Were uninterpretable/ intermediate test results reported?                                                                         | 1  | 1 | 1 | 1 | 1 | 1 | 1  | 1 | 1 | 1  |
| 14. Were withdrawals from the study explained?                                                                                        | 1  | 0 | 0 | 1 | 0 | 1 | 1  | 0 | 0 | 1  |
| Total score                                                                                                                           | 10 | 8 | 7 | 9 | 9 | 8 | 11 | 9 | 7 | 11 |

---

QUADAS = quality assessment of studies of diagnostic accuracy

**SUPPLEMENTAL TABLE 3. The comparison of the performance between PET and PET-CT using bivariate model**

|                       | PET (n = 5)                  | PET-CT (n = 5)               |
|-----------------------|------------------------------|------------------------------|
| Sensitivity           | 66% (95% CI = 33% to 89%)    | 13% (95% CI = 2% to 56%)     |
| Specificity           | 97% (95% CI = 90% to 99%)    | 98% (95% CI = 87% to 100%)   |
| Diagnostic odds ratio | 57.2 (95% CI = 13.9-235.4)   | 7.9 (95% CI = 1.0 to 61.8)   |
| Positive LR           | 19.9 (95% CI = 7.2 to 55.4)  | 7.0 (95% CI = 1.0 to 47.4)   |
| Negative LR           | 0.35 (95% CI = 0.14 to 0.87) | 0.89 (95% CI = 0.69 to 1.15) |
